# Supplementary material
Source: HighWire-hosted journal article supplement (https://www.cmaj.ca/highwire/filestream/57669/field_highwire_adjunct_files/0/smoking-mackenzie-1-at.pdf)
Supplement: smoking-mackenzie-1-at.pdf [file smoking-mackenzie-1-at.pdf]

**Appendix 1 (as supplied by author): Search strategy**

| Search chronology | Findings                                                                                                                                                                                                                                                                                                                                                                                                                                                                                                                                                                                                                                                                                                                                                                                                                                                                                                                                                                                                                                                                                                                                                                                                                                                                                                                                                                                                                                                                                                                                                                                                          |
|-------------------|-------------------------------------------------------------------------------------------------------------------------------------------------------------------------------------------------------------------------------------------------------------------------------------------------------------------------------------------------------------------------------------------------------------------------------------------------------------------------------------------------------------------------------------------------------------------------------------------------------------------------------------------------------------------------------------------------------------------------------------------------------------------------------------------------------------------------------------------------------------------------------------------------------------------------------------------------------------------------------------------------------------------------------------------------------------------------------------------------------------------------------------------------------------------------------------------------------------------------------------------------------------------------------------------------------------------------------------------------------------------------------------------------------------------------------------------------------------------------------------------------------------------------------------------------------------------------------------------------------------------|
| Aug 2007          | <p>Initial attempts to identify the source of the ‘23 times more toxic’ finding were made in August 2007 as part of research for a previous paper on the advocacy campaign to regulate smoking in cars in Australia.<sup>1</sup> The figure originated in a news story published in the <i>Rocky Mountain News (RMN)</i>, a Colorado newspaper on 10 Jan 1998;<sup>2</sup> this news report was subsequently cited in the Ontario Medical Association’s 2004 report on second hand smoke exposure.<sup>3</sup></p> <p>Subsequent efforts to locate the scientific source for the <i>RMN</i> source via Medline searches returned two peer-reviewed articles that referenced the OMA report: Sweda et al, <i>Tob Control</i> 1998;<sup>4</sup> and Gehrman and Hovell, <i>Nicotine Tob Res</i> 2003<sup>5</sup> (which also cited Sweda et al 1998).</p> <p>A peer-reviewed article by Williams et al in <i>Families, Systems, &amp; Health</i> 2005<sup>6</sup> referred to the figure with no attribution.</p> <p>Unreferenced use of the figure was found in a 17 June 2005 Australian Medical Association press release;<sup>7</sup> and in statements by Australian government ministers<sup>8-10</sup> and the National Heart Foundation of Australia.<sup>11</sup></p> <p>Searches of Australia media via the Factiva database<sup>12</sup> returned 22 news media reports: 19 made unattributed reference to the 23 times concept, 1 each cited the OMA report and the National Heart Foundation of Australia; and 1 referred to second hand smoke exposure as “20 times more toxic” than in the home.</p> |
| May/June 2008     | <p>Searching Medline, Factiva and Google during research for this paper returned the following publications that cite the OMA report as source for the 23 times figure:</p> <ul style="list-style-type: none"> <li>- Leatherdale et al. <i>Tob Control</i> 2008<sup>13</sup></li> <li>- British Columbia. Ministry of Health. <i>Protecting your Family from Second-hand Smoke</i>, 2005<sup>14</sup></li> <li>- 17 reports in Canadian news media (identified via Factiva)<sup>12</sup></li> <li>- information on NGO websites — ASH (US),<sup>15</sup> GASP NJ,<sup>16</sup> and Car and Home Smoke-Free Zone (NSW, Australia).<sup>17</sup></li> </ul> <p>Unattributed use of the figure appeared in <i>Irish Times</i> 6 Feb 2008,<sup>18</sup> and on the ASH Ireland website on 28 Jan 2008.<sup>19</sup></p>                                                                                                                                                                                                                                                                                                                                                                                                                                                                                                                                                                                                                                                                                                                                                                                               |
| March/April 2009  | <p>Final searches during revision of this paper in 2009 found “Colorado research” cited by ASH Ireland,<sup>20</sup> in a February 2009 reports in the <i>Irish Times</i><sup>21</sup> and the <i>Irish Medical Times</i>.<sup>22</sup></p> <p>The OMA report is cited by:</p> <ul style="list-style-type: none"> <li>- ASH Scotland, <i>Second-hand smoke in cars</i>, April 2009<sup>23</sup></li> <li>- Kabir et al. <i>Eur Respir J</i> 2009<sup>24</sup></li> </ul> <p>The Kabir paper, including the 23 times figure, were cited in <i>Sunday Times (UK)</i> 19 Apr 2009.<sup>25</sup></p> <p>The <i>Times</i> report and the figure were subsequently cited on websites of ASH UK, 20 Apr 2009;<sup>25</sup> European Lung Foundation, 24 Apr 2009;<sup>26</sup> and the Oxford Health Alliance, 23 Apr 2009.<sup>27</sup></p> <p>The most recent example to cite the OMA report is Leatherdale and Ahmed, <i>Cancer Causes Control</i> 2009.<sup>28</sup></p>                                                                                                                                                                                                                                                                                                                                                                                                                                                                                                                                                                                                                                             |

## References

1. Freeman B, Chapman S, Storey P. Banning smoking in cars carrying children: an analytical history of a public health advocacy campaign. *Aust N Z J Public Health* 2008;32(1):60-65.
2. Sanko B. Bill targets smokers in cars: Boulder Senator says state should step in on behalf of children. *Rocky Mountain News* 10 Jan 1998; 6A.
3. Ontario Medical Association. *Exposure to secondhand smoke: Are we protecting our kids? A position paper by the Ontario Medical Association*. Toronto: Ontario Medical Association; 2004.  
<http://www.oma.org/phealth/smoke2004.pdf> (accessed 21 Feb 2009)
4. Sweda EL, Gottlieb MA, Porfiri RC. Protecting children from exposure to environmental tobacco smoke. *Tob Control* 1998;7:1-2.
5. Gehrman CA, Hovell MF. Protecting children from environmental tobacco smoke (ETS) exposure: A critical review. *Nicotine Tob Res* 2003;5(3):289 - 301.
6. Williams GC, Williams SA, Korn RJ. Secondhand smoke (SHS) deserves more than secondhand attention: modifying the 5As model to include counselling to eliminate exposure. *Fam Syst Health* 2005;23(3):266-277.
7. Australian Medical Association. Media release. *Smoking in cars*. 17 Jun 2005; [http://www.amavic.com.au/page/Media/Media\\_Releases/2005/Smoking\\_in\\_Cars/](http://www.amavic.com.au/page/Media/Media_Releases/2005/Smoking_in_Cars/) (accessed 25 Feb 2009).
8. Government of South Australia. News. *Smoking in cars*. 13 Mar 2007. <http://www.ministers.sa.gov.au/news.php?id=1368> (accessed 25 Feb 2009)
9. ABC News. *Smoking ban*. 15 Dec 2006. <http://www.abc.net.au/news/stories/2006/12/15/1812731.htm> (accessed 12 May 2009).
10. ABC. The world today. *South Australia to introduce anti-smoking car laws*. 17 Nov 2006. <http://www.abc.net.au/worldtoday/content/2006/s1791115.htm> (accessed 23 May 2009).
11. Bunce J. Fed: Plan to ban smoking in cars to save children. *Australian Associated Press*. 14 Dec 2006;
12. Dow Jones. *Factiva*. <http://factiva.com/> (accessed 08 Jan 2010).
13. Leatherdale ST, Smith P, Ahmed R. Youth exposure to smoking in the home and in cars: how often does it happen and what do youth think about it? *Tob Control* 2008;17:86-92.
14. British Columbia. Ministry of Health. *Protecting your Family from Second-hand Smoke*. Tobacco Prevention Series - Number 30c. Victoria BC: 2005 <http://www.healthlinkbc.ca/healthfiles/hfile30c.stm> (accessed 21 Feb 2009)
15. ASH. *Canada: Smoking Bans in Cars Carrying Children Gains Support*. [Excerpts from report published in *Orillia Today* 20 Oct 2004] 2009. <http://www.no-smoking.org/oct04/10-20-04-5.html> (accessed 25 Mar 2009).
16. GASP New Jersey. *Protecting foster/resource family and children from secondhand smoke in homes and cars*. [http://www.njgasp.org/d\\_Foster\\_Homes\\_and\\_Cars.pdf](http://www.njgasp.org/d_Foster_Homes_and_Cars.pdf) (accessed 25 Feb 2009).
17. Car and home smoke-free zone. *10 MYTHS About Environmental Tobacco Smoke (ETS) & Passive Smoking*

- [http://www.nswcc.org.au/html/prevention/smoking\\_tobacco/ets/ten\\_myths.htm](http://www.nswcc.org.au/html/prevention/smoking_tobacco/ets/ten_myths.htm) (accessed 12 Jun 2009).
18. Doyle K. Smoking out the last of them. *Irish Times* 6 Feb 2008; <http://news.myhome.ie/newspaper/motoring/2008/0206/1201903560519.html> (accessed 25 Feb 2009)
  19. ASH Ireland. *ASH Ireland launch campaign to BAN Smoking in Cars Transporting Children*. 28 Jan 2008. [http://www.ash.ie/News/Latest\\_News/ASH\\_launch\\_campaign.html](http://www.ash.ie/News/Latest_News/ASH_launch_campaign.html) (accessed 25 Feb 2009).
  20. ASH Ireland. *ASH Ireland brief politicians on banning 'Smoking in Cars Transporting Children Under 16'*. 24 Feb 2009. [http://www.ash.ie/News/Latest\\_News/ASH\\_Ireland\\_brief\\_Politicians.html](http://www.ash.ie/News/Latest_News/ASH_Ireland_brief_Politicians.html) (accessed 12 May 2009).
  21. Healy A. Smoking ban sought in cars carrying children. *Irish Times*. 24 Feb 2009 <http://www.irishtimes.com/newspaper/breaking/2009/0224/breaking38.htm> (accessed 14 May 2009).
  22. Culliton G. *Smoking 'should be banned in cars containing under 16s'*. *Irish Medical Times*. 25 Feb 2009. [http://www.imt.ie/news/2009/02/smoking\\_should\\_be\\_banned\\_in\\_ca.html](http://www.imt.ie/news/2009/02/smoking_should_be_banned_in_ca.html) (accessed 11 May 2009).
  23. ASH Scotland. *Second-hand smoke in cars*. April 2009. <http://www.ashscotland.org.uk/ash/files/Smoking%20in%20cars%20April%202009.pdf> (accessed 9 May 2009).
  24. Kabir Z, Manning PJ, Holohan J et al. Second hand smoke exposure in cars and respiratory health effects in children. *Eur Respir J* 2009;doi:0:09031936.00167608. <http://erj.ersjournals.com/cgi/rapidpdf/09031936.00167608v1> (accessed 12 Dec 2009).
  25. Battles J. Children harmed by smoke in cars. *Sunday Times (Times online)*. 19 Apr 2009 <http://www.timesonline.co.uk/tol/news/world/ireland/article6122888.ece> (accessed 12 May 2009).
  26. European Lung Foundation. *Children harmed by smoke in cars*. 24 Apr 2009. <http://www.european-lung-foundation.org/index.php?id=13743> (accessed 14 May 2009).
  27. Oxford Health Alliance. *Children damaged by passive smoking*. 23 Apr 2009. <http://www.oxha.org/alliance-alert/2009-q2-april-june/alert.2009-04-23.3170004258> (accessed 12 May 2009).
  28. Leatherdale ST, Ahmed R. Second-hand smoke exposure in homes and in cars among Canadian youth: current prevalence, beliefs about exposure, and changes between 2004 and 2006. *Cancer Causes Control* 2009;20(6):855 - 865.
